# Supplementary material for: The contribution of doped-Al to the colossal permittivity properties of AlxNb0.03Ti0.97−xO2 rutile ceramics
Source: Royal Society of Chemistry journal article supplement (doi:10.1039/c6tc00742b), 2016-01-01
Supplement: c6tc00742b1.pdf [file c6tc00742b1.pdf]

**The contribution of doped-Al on the colossal permittivity properties  
of  $\text{Al}_x\text{Nb}_{0.03}\text{Ti}_{0.97-x}\text{O}_2$  rutile ceramics**

Yongli Song<sup>a</sup>, Xianjie Wang<sup>\*a</sup>, Xingquan Zhang<sup>b</sup>, Yu Sui<sup>\*a</sup>, Yu Zhang<sup>a</sup>, Zhiguo Liu<sup>a</sup>, Zhe Lv<sup>a</sup>, Yang  
Wang<sup>c</sup>, Ping Xu<sup>d</sup> and Bo Song<sup>\*a c</sup>

<sup>a</sup> Department of Physics, School of Science, Harbin Institute of Technology, Harbin 150001, China

<sup>b</sup> Analytical and Testing Center, Southwest University of Science and Technology, Mianyang 621010,  
China

<sup>c</sup> Academy of Fundamental and Interdisciplinary Sciences, Harbin Institute of Technology, Harbin  
150001, China.

<sup>d</sup> School of Chemistry and Chemical Engineering, Harbin Institute of Technology, Harbin 150001,  
China

\* To whom correspondence should be addressed: wangxianjie@hit.edu.cn

## Supplementary information:

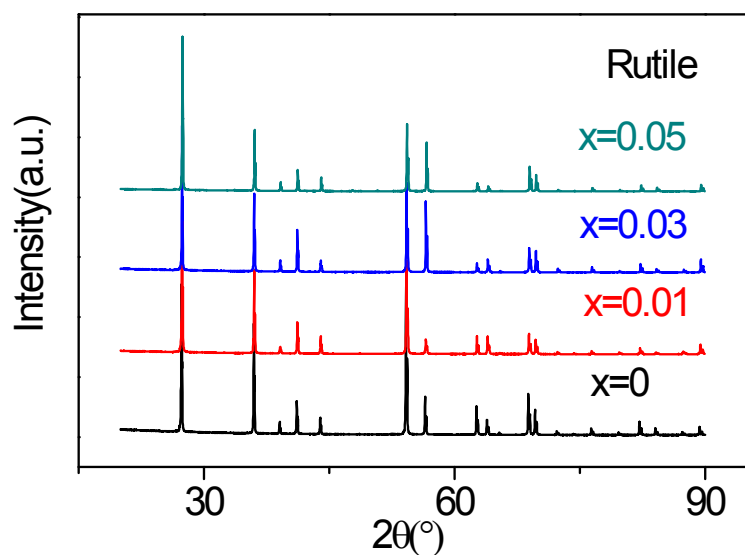

**Figure S1** XRD patterns of Al+Nb co-doped rutile TiO<sub>2</sub> with different co-doping levels. The results indicate that all compositions have a pure phase rutile structure in average.

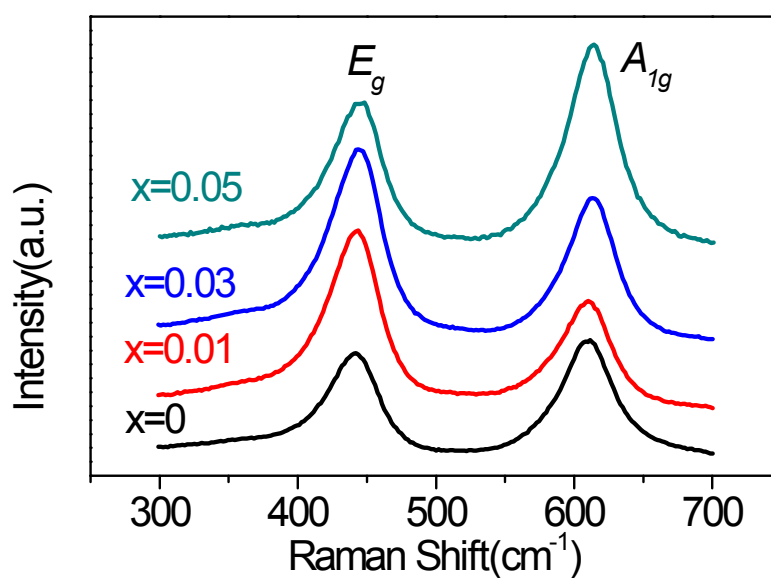

**Figure S2.** Raman spectroscopy of Al+Nb co-doped rutile TiO<sub>2</sub>. Two strongest E<sub>g</sub> and A<sub>1g</sub> modes<sup>1</sup> at ~445 cm<sup>-1</sup> and ~618 cm<sup>-1</sup> were detected, which also indicate the pure rutile TiO<sub>2</sub> were synthesis

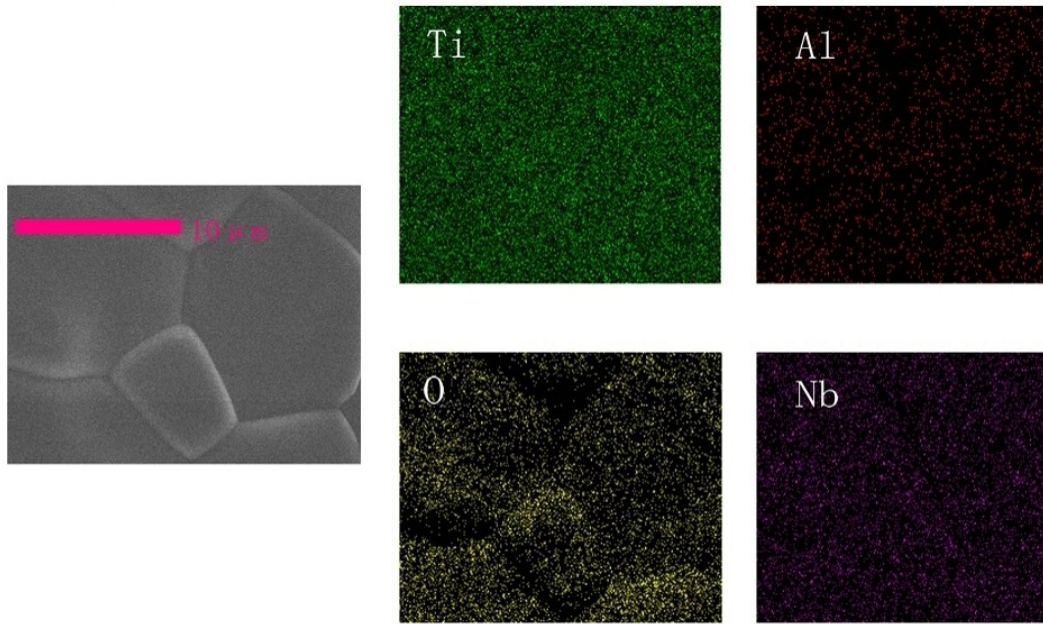

**Figure S3.** Element mapping of  $\text{Al}_{0.03}\text{Nb}_{0.03}\text{Ti}_{0.94}\text{O}_2$  ceramics. The size of grain is about  $10\mu\text{m}$  and all of the dopants are homogeneously distributed through the ceramics.

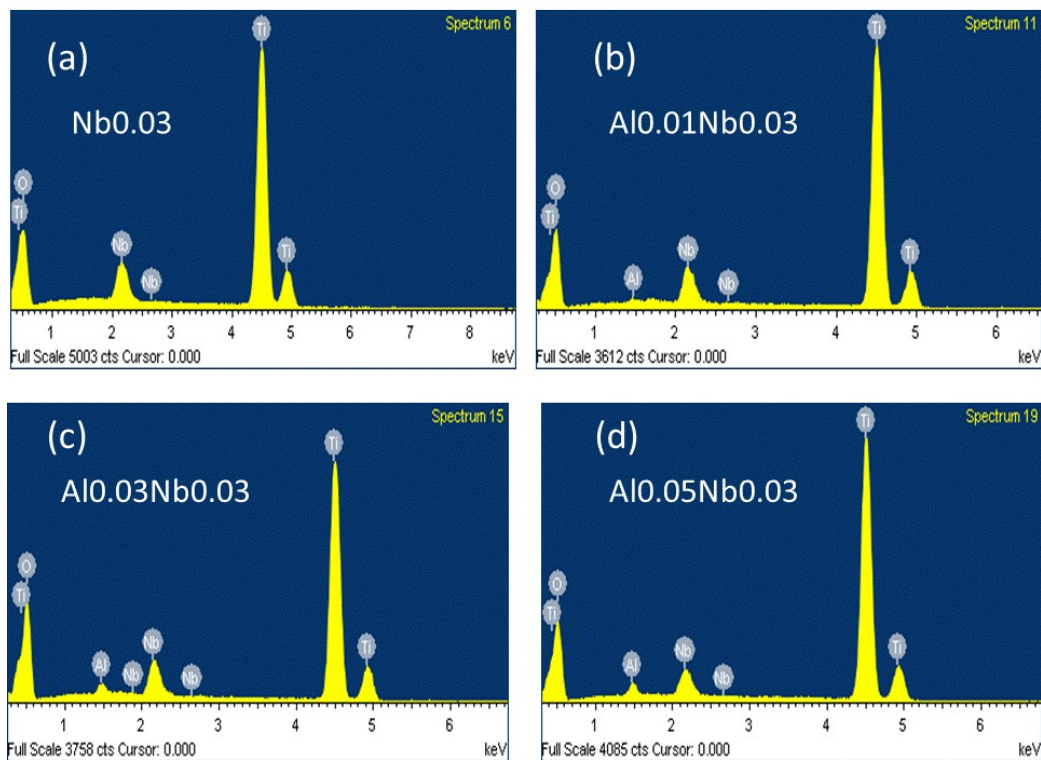

**Figure S4.** EDX of  $\text{Al}_x\text{Nb}_{0.03}\text{Ti}_{0.97-x}\text{O}_2$  ( $x = 0.01, 0.03, 0.05$ ) ceramics, (a)  $x=0$ , (b)  $x=0.01$ , (c)  $x=0.03$ , (d)  $x=0.05$ . The doping amount of Al element increased with increasing Al-doping.

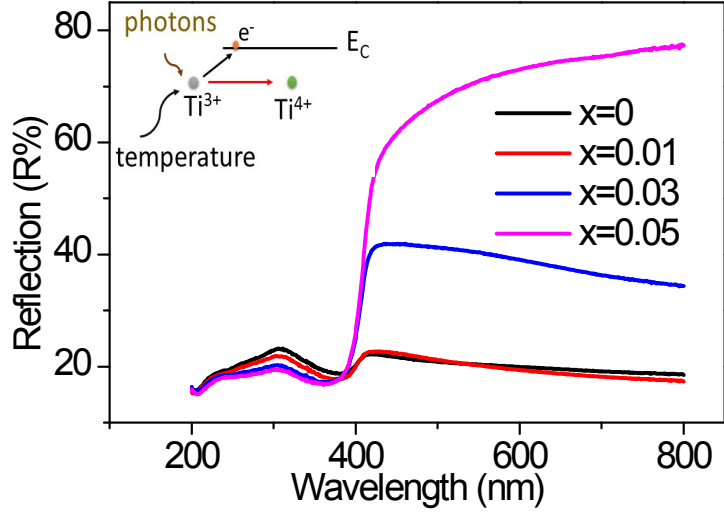

**Figure S5.** Reflectance spectra of  $\text{Al}_x\text{Nb}_{0.03}\text{Ti}_{0.97-x}\text{O}_2$  ( $x=0, 0.01, 0.03, 0.05$ ) ceramics.

Reflection spectrum is a powerful evidence for the hypothesis, the electrons of  $\text{Ti}^{3+}$  introduced by doped Nb can be easily be excited by probe light and show a low value in reflection spectrum, as shown in the insert. The reflection spectrum of all the samples have a sharply drop in the spectral region of  $\lambda \sim 400$  nm, which is attributed to the band gap  $\sim 3$  eV of rutile  $\text{TiO}_2$ . In the spectral region of  $\lambda > 400$  nm,  $\text{Nb}_{0.03}\text{Ti}_{0.97}\text{O}_2$  ceramics and  $\text{Al}_{0.01}\text{Nb}_{0.03}\text{Ti}_{0.96}\text{O}_2$  ceramics have a similar reflection valve  $\sim 20\%$ . With the increase of Al doping amount to 3%, the valve of reflection spectrum grow to 40%. When Al is excessive doping, the reflection valve is as high as 80%. For  $\text{Nb}_{0.03}\text{Ti}_{0.97}\text{O}_2$  and  $\text{Al}_{0.01}\text{Nb}_{0.03}\text{Ti}_{0.96}\text{O}_2$  ceramics, a lot of  $\text{Ti}^{3+}$  can absorb photons and result in a very low reflectivity. For  $\text{Al}_{0.03}\text{Nb}_{0.03}\text{Ti}_{0.94}\text{O}_2$  ceramics, the remaining few  $\text{Ti}^{3+}$  can absorb a small amount of photons and show a moderate reflectivity about 40%. When the amount of doped Al is more than that of Nb, there is almost no  $\text{Ti}^{3+}$  left, so high reflectivity can be achieved.

Relationship between relaxation  $\tau$  time and  $R_b$ : the reason for the larger bulk activation energy calculated by dielectric permittivity measurements at different temperature than real value

The relaxation time  $\tau$  associated with the dielectric permittivity depends on the frequency can be described by the following equations:<sup>S1</sup>

$$\tau = \frac{\tau_{gb}R_b + \tau_b R_{gb}}{R_b + R_{gb}} \quad (\text{S1})$$

Here,  $\tau_b = C_b R_b$ ,  $\tau_{gb} = C_{gb} R_{gb}$ ,  $R_b$  and  $R_{gb}$  are the resistance of the bulk and grain boundary, respectively.  $C_b$  and  $C_{gb}$  are the capacitance of the bulk and at the grain boundary, with  $C_{gb} \gg C_b$ ,  $R_{gb} \gg R_b$ .<sup>S1</sup> Therefore, Eq (S1) can be formulated as

$$\tau = k R_b \quad (\text{S2})$$

Here,  $k = R_{gb} / (R_{gb} + R_b) C_{gb}$  is a value closed to  $C_{gb}$  in view of that  $R_{gb}$  is much larger than  $R_b$ . So, the activation energy of bulk can be calculated by the following formula, and the dielectric relaxation time  $\tau$  becomes smaller with increasing temperature due to the reduction of  $R_b$ .

$$\tau = \tau_0 \exp\left(\frac{E_a}{k_B T}\right) \quad (\text{S3})$$

But actually,  $k$  should slowly become larger as the temperature increases base on that the conductive activation energy of  $R_{gb}$  is much larger than that of  $R_b$ . So the activation energy of bulk is larger than real value.

S1. M. R. Shen, S. B. Ge and W. W. Cao, *J. Phys. D: Appl. Phys*, 2001, **34**, 2935.
